# Supplementary material for: Mimicking the Organic and Inorganic Composition of Anabolic Bone Enhances Human Mesenchymal Stem Cell Osteoinduction and Scaffold Mechanical Properties
Source: PubMed Central journal article supplement (PMC7347795; doi:10.3389/fbioe.2020.00753), 2020-07-03
Supplement: Presentation_1.pdf [file Presentation_1.pdf]

**Figure Supplementary 1:** (A) Schematic illustrating the fabrication of PLGA/pSi microspheres in Coll/MgHA scaffolds. (B) Cross sectional diagram indicates culture media flows from bottom to top through a porous scaffold, as indicated by the arrows. (C) Top view of the perfusion bioreactor, which is capable of culturing six constructs simultaneously.

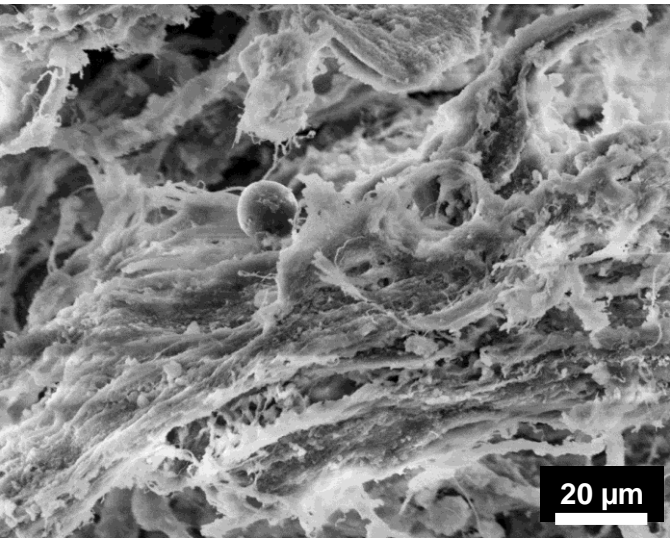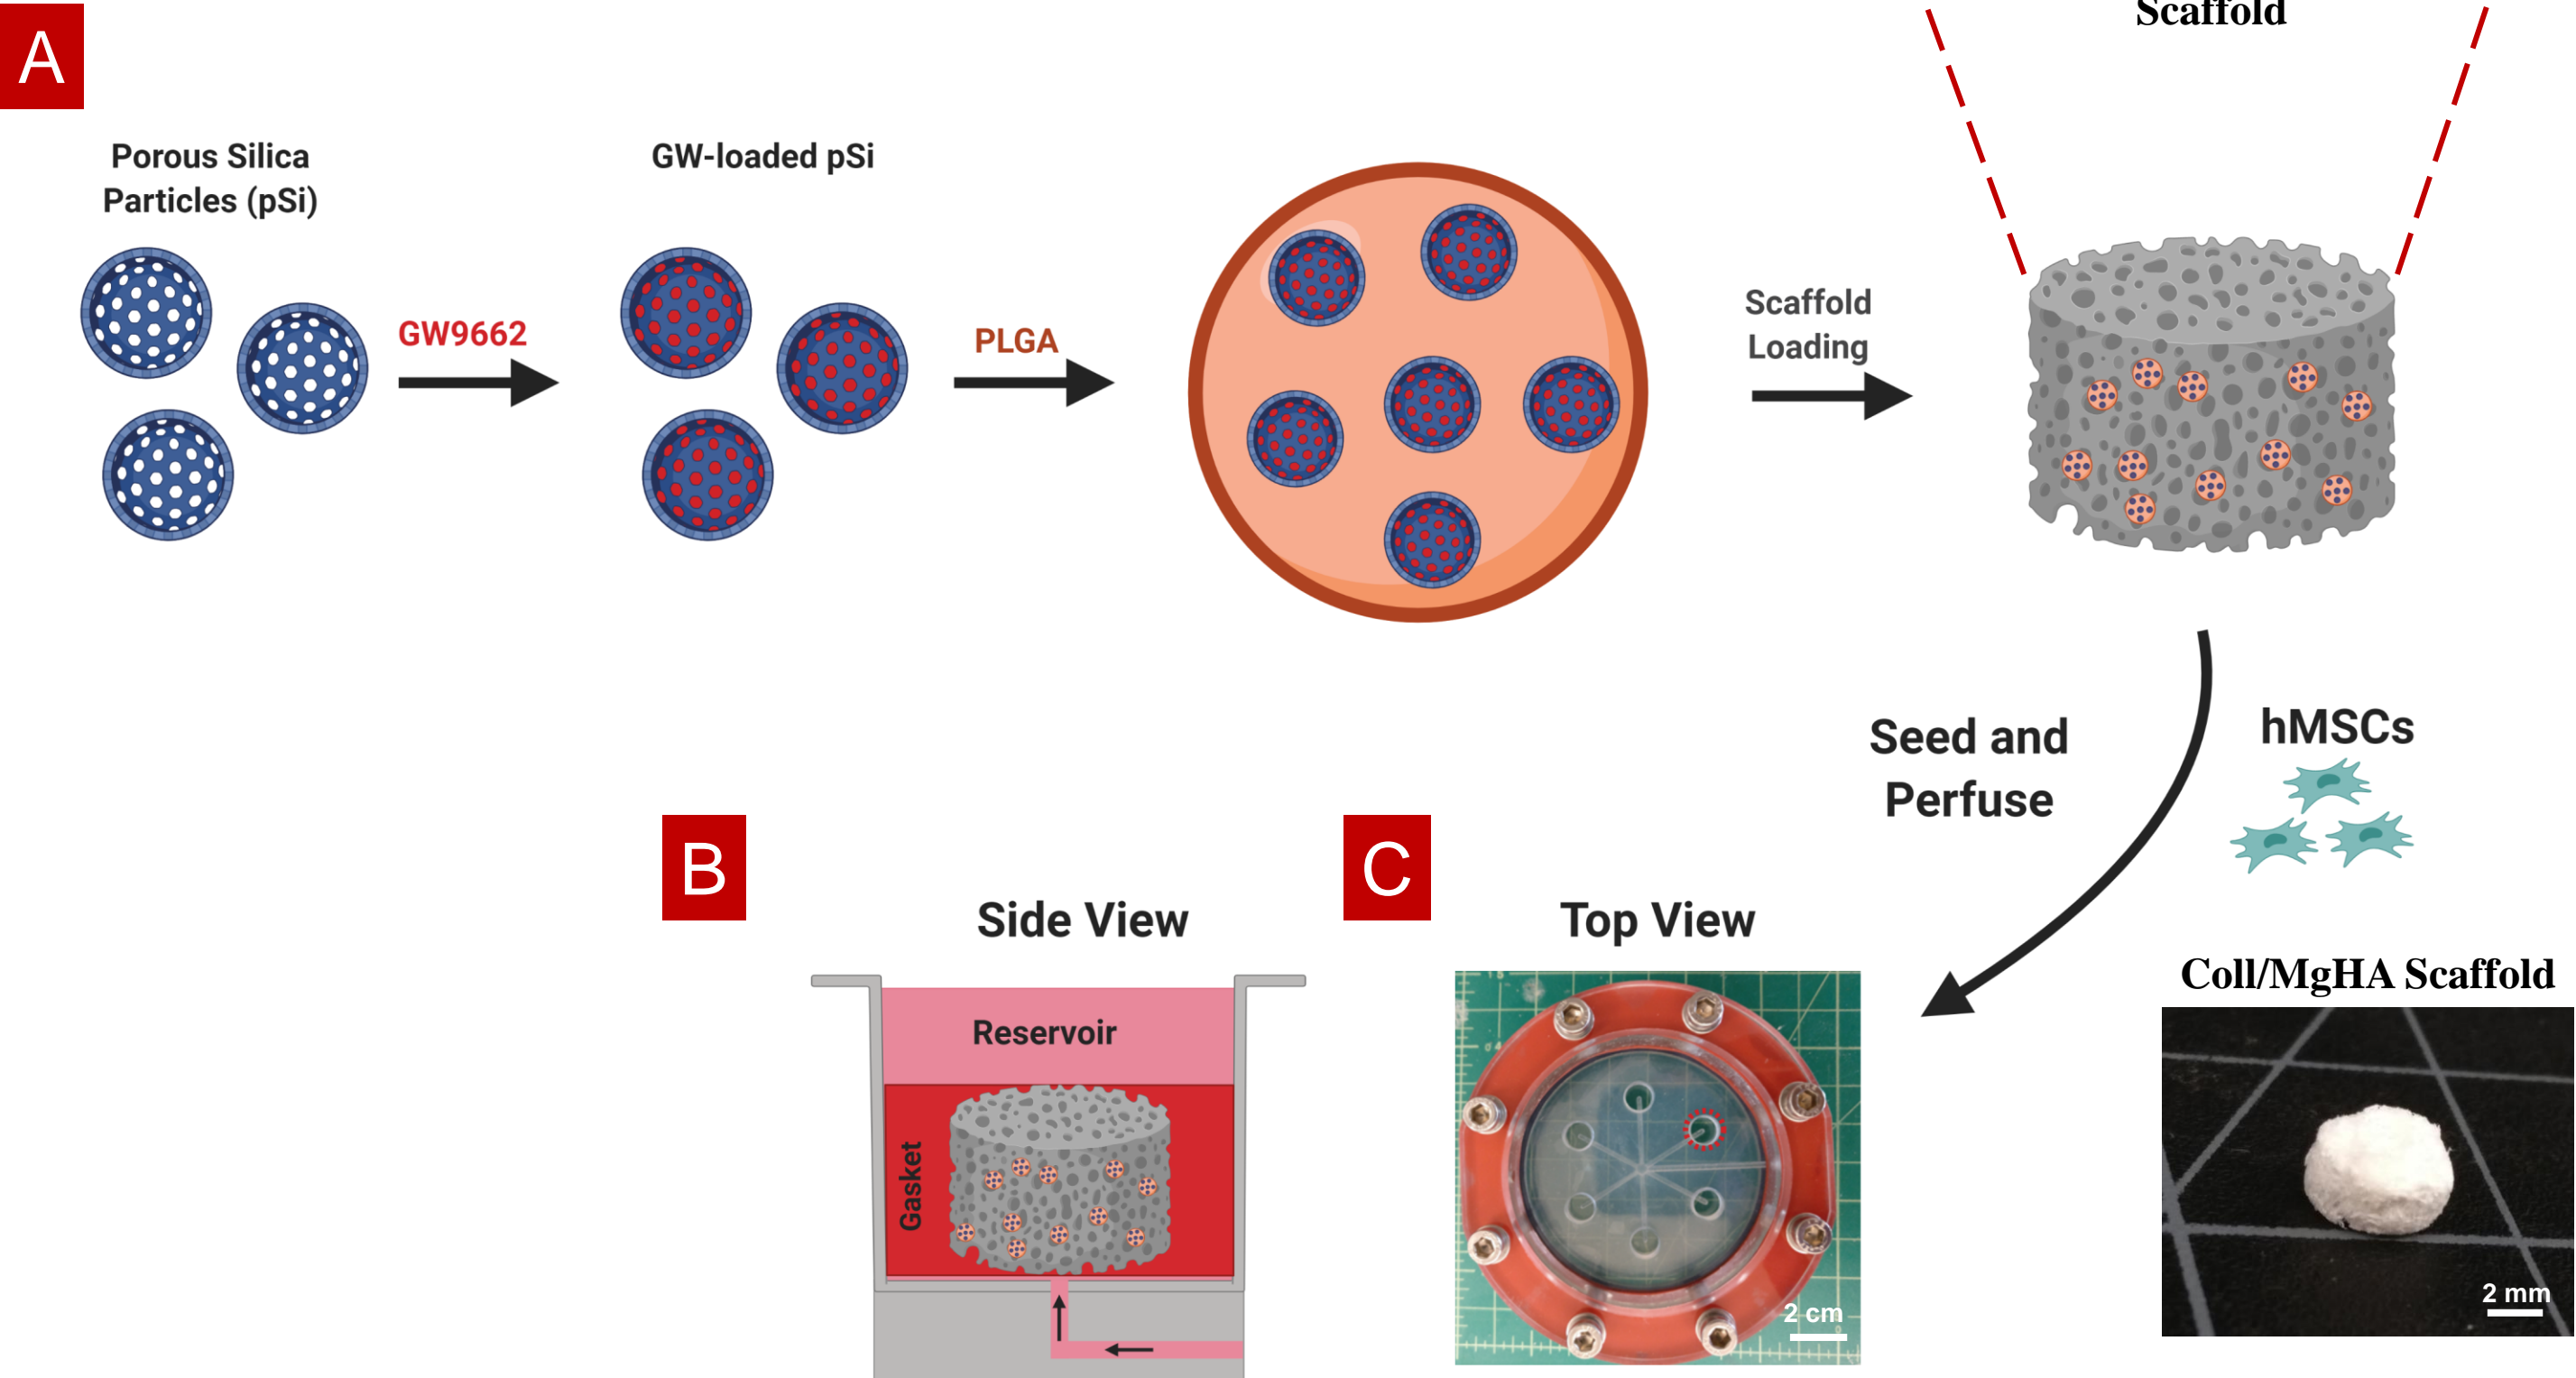

| Target             | Sequence                                                            |
|--------------------|---------------------------------------------------------------------|
| Human GAPDH        | Forward: ctctctgctcctcctgttcgac<br>Reverse: tgagcgatgtggctcggct     |
| Human Collagen VI  | Forward: ccatcgtgcgagcc<br>Reverse: tgcgccgactcgtgc                 |
| Human Collagen XII | Forward: cttcattgaggcagaagtt<br>Reverse: agacacaagagcagcaatga       |
| Human BMP2         | Forward: cccagcgtgaaaagagagac<br>Reverse: gagaccgcagtcctctaaag      |
| Human ALP          | Forward: gacccttgacccccacaat<br>Reverse: gctcgtactgcatgtcccct       |
| Human OCN          | Forward: tcacactcctcgccctattg<br>Reverse: ctctcactacctcgctgcc       |
| Human OPN          | Forward: catcacctgtgccataaccagtt<br>Reverse: ttggaaggggtctgtggggcta |

**Table Supplementary 1:** Primer sequences utilized for qRT-PCR analysis.

| Scaffold/Culture Condition | DF | Variance | $\chi^2$ | P Value |
|----------------------------|----|----------|----------|---------|
| CCM/Static                 | 7  | 6.44E+09 | 10.7985  | 0.14765 |
| DMSO/Static                |    | 4.45E+09 |          |         |
| pSi/Static                 |    | 3.45E+09 |          |         |
| GW/Static                  |    | 6.57E+07 |          |         |
| CCM/Perfused               |    | 9.40E+08 |          |         |
| DMSO/Perfused              |    | 1.03E+09 |          |         |
| pSi/Perfused               |    | 1.19E+08 |          |         |
| GW/Perfused                |    | 2.05E+09 |          |         |

**Table Supplementary 2:** Bartlett's test for homogeneity of variances on calculated cell number for all scaffold and media formulations.

| ANOVA table            | SS           | DF | MS          | F (DFn, DFd)       | P value  |
|------------------------|--------------|----|-------------|--------------------|----------|
| Interaction            | 2015562891   | 3  | 671854297   | F (3, 16) = 0.4348 | P=0.7311 |
| Scaffold/Culture Media | 185357046568 | 3  | 61785682189 | F (3, 16) = 39.99  | P<0.0001 |
| Perfusion              | 51029447337  | 1  | 51029447337 | F (1, 16) = 33.03  | P<0.0001 |
| Residual               | 24722643661  | 16 | 1545165229  |                    |          |

**Table Supplementary 3:** Two-way ANOVA table for the calculated cell number for all scaffold and media formulations.

| <b>Tukey's multiple comparisons test</b> | <b>Mean 1</b> | <b>Mean 2</b> | <b>Mean Diff.</b> | <b>95.00% CI of diff.</b> | <b>Adjusted P Value</b> |
|------------------------------------------|---------------|---------------|-------------------|---------------------------|-------------------------|
| DMSO:Static vs. DMSO:Perfused            | 84268         | 146683        | -62415            | -173534 to 48704          | 0.5430                  |
| DMSO:Static vs. pSi:Static               | 84268         | 163278        | -79010            | -190129 to 32109          | 0.2778                  |
| DMSO:Static vs. pSi:Perfused             | 84268         | 269831        | -185563           | -296682 to -74444         | 0.0006                  |
| DMSO:Static vs. GW:Static                | 84268         | 132434        | -48166            | -159285 to 62953          | 0.7966                  |
| DMSO:Static vs. GW:Perfused              | 84268         | 240461        | -156193           | -267312 to -45074         | 0.0033                  |
| DMSO:Static vs. CCM:Static               | 84268         | 311292        | -227024           | -338143 to -115905        | <0.0001                 |
| DMSO:Static vs. CCM:Perfused             | 84268         | 403185        | -318917           | -430036 to -207799        | <0.0001                 |
| DMSO:Perfused vs. pSi:Static             | 146683        | 163278        | -16595            | -127714 to 94524          | 0.9994                  |
| DMSO:Perfused vs. pSi:Perfused           | 146683        | 269831        | -123148           | -234266 to -12029         | 0.0245                  |
| DMSO:Perfused vs. GW:Static              | 146683        | 132434        | 14249             | -96870 to 125368          | 0.9998                  |
| DMSO:Perfused vs. GW:Perfused            | 146683        | 240461        | -93778            | -204896 to 17341          | 0.1325                  |
| DMSO:Perfused vs. CCM:Static             | 146683        | 311292        | -164609           | -275727 to -53490         | 0.0020                  |
| DMSO:Perfused vs. CCM:Perfused           | 146683        | 403185        | -256502           | -367621 to -145383        | <0.0001                 |
| pSi:Static vs. pSi:Perfused              | 163278        | 269831        | -106553           | -217672 to 4566           | 0.0651                  |
| pSi:Static vs. GW:Static                 | 163278        | 132434        | 30844             | -80275 to 141963          | 0.9739                  |
| pSi:Static vs. GW:Perfused               | 163278        | 240461        | -77183            | -188302 to 33936          | 0.3020                  |
| pSi:Static vs. CCM:Static                | 163278        | 311292        | -148014           | -259133 to -36895         | 0.0054                  |
| pSi:Static vs. CCM:Perfused              | 163278        | 403185        | -239907           | -351026 to -128789        | <0.0001                 |
| pSi:Perfused vs. GW:Static               | 269831        | 132434        | 137397            | 26278 to 248515           | 0.0104                  |
| pSi:Perfused vs. GW:Perfused             | 269831        | 240461        | 29370             | -81749 to 140489          | 0.9800                  |
| pSi:Perfused vs. CCM:Static              | 269831        | 311292        | -41461            | -152580 to 69658          | 0.8892                  |
| pSi:Perfused vs. CCM:Perfused            | 269831        | 403185        | -133355           | -244473 to -22236         | 0.0132                  |
| GW:Static vs. GW:Perfused                | 132434        | 240461        | -108027           | -219145 to 3092           | 0.0598                  |
| GW:Static vs. CCM:Static                 | 132434        | 311292        | -178858           | -289976 to -67739         | 0.0009                  |
| GW:Static vs. CCM:Perfused               | 132434        | 403185        | -270751           | -381870 to -159632        | <0.0001                 |
| GW:Perfused vs. CCM:Static               | 240461        | 311292        | -70831            | -181950 to 40288          | 0.3967                  |
| GW:Perfused vs. CCM:Perfused             | 240461        | 403185        | -162725           | -273843 to -51606         | 0.0022                  |
| CCM:Static vs. CCM:Perfused              | 311292        | 403185        | -91894            | -203012 to 19225          | 0.1464                  |

**Table Supplementary 4:** Tukey-multiple comparison results between calculated cell number for all scaffold and media formulations.

| Gene             | DF | Variances of Ct |             |            |           |               |              |             | $\chi^2$ | P Value |
|------------------|----|-----------------|-------------|------------|-----------|---------------|--------------|-------------|----------|---------|
|                  |    | CCM Monolayer   | DMSO Static | pSi Static | GW Static | DMSO Perfused | pSi Perfused | GW Perfused |          |         |
| GAPDH (Day 8)    | 6  | 0.040915        | 0.043722    | 0.012726   | 0.008238  | 0.027559      | 0.001815     | 0.00081     | 8.4176   | 0.20905 |
| Coll VI (Day 8)  | 6  | 0.091026        | 0.003855    | 0.022544   | 0.04407   | 0.048581      | 0.187793     | 0.04922     | 5.69369  | 0.45836 |
| Coll XII (Day 8) | 6  | 0.925951        | 0.062559    | 0.094248   | 0.190015  | 0.151693      | 0.580326     | 0.47209     | 4.76457  | 0.57434 |
| ALP (Day 8)      | 6  | 0.109881        | 0.053793    | 0.010559   | 0.008893  | 0.027848      | 0.030492     | 0.05182     | 3.81929  | 0.70111 |
| BMP2 (Day 8)     | 6  | 0.332015        | 0.026678    | 0.104059   | 0.4476    | 0.004559      | 0.15927      | 0.017878    | 10.3546  | 0.11049 |
| GAPDH (Day 21)   | 6  | 0.058337        | 0.000144    | 0.040959   | 0.041181  | 0.098233      | 0.006381     | 0.026181    | 10.8626  | 0.09272 |
| OPN (Day 21)     | 6  | 0.006004        | 0.021264    | 0.320164   | 0.035093  | 0.118517      | 0.229544     | 0.071987    | 7.76493  | 0.25584 |
| OCN (Day 21)     | 6  | 1.578033        | 0.129744    | 1.605737   | 0.060859  | 0.146293      | 0.15957      | 0.037544    | 11.1802  | 0.08296 |

**Table Supplementary 5:** Bartlett's test for homogeneity of variances for the  $C_T$  values for all genes/times points.

| ANOVA table           | SS     | DF | MS      | F (DFn, DFd)      | P value  |
|-----------------------|--------|----|---------|-------------------|----------|
| Interaction           | 0.6261 | 2  | 0.3131  | F (2, 12) = 6.567 | P=0.0118 |
| Presence/Source of GW | 1.981  | 2  | 0.9903  | F (2, 12) = 20.77 | P=0.0001 |
| Perfusion             | 4.688  | 1  | 4.688   | F (1, 12) = 98.34 | P<0.0001 |
| Residual              | 0.5720 | 12 | 0.04767 |                   |          |

**Table Supplementary 6:** Two-way ANOVA table results for the Coll VI  $\Delta\Delta C_T$  values.

| Tukey's multiple comparisons test | Mean 1  | Mean 2 | Mean Diff. | 95.00% CI of diff. | Adjusted P Value |
|-----------------------------------|---------|--------|------------|--------------------|------------------|
| DMSO:Static vs. DMSO:Perfused     | -0.9200 | -2.326 | 1.406      | 0.8072 to 2.005    | <0.0001          |
| DMSO:Static vs. pSi:Static        | -0.9200 | -1.360 | 0.4400     | -0.1588 to 1.039   | 0.1951           |
| DMSO:Static vs. pSi:Perfused      | -0.9200 | -2.500 | 1.580      | 0.9812 to 2.179    | <0.0001          |
| DMSO:Static vs. GW:Static         | -0.9200 | -2.170 | 1.250      | 0.6512 to 1.849    | 0.0001           |
| DMSO:Static vs. GW:Perfused       | -0.9200 | -2.686 | 1.766      | 1.167 to 2.365     | <0.0001          |
| DMSO:Perfused vs. pSi:Static      | -2.326  | -1.360 | -0.9660    | -1.565 to -0.3672  | 0.0014           |
| DMSO:Perfused vs. pSi:Perfused    | -2.326  | -2.500 | 0.1740     | -0.4248 to 0.7728  | 0.9115           |
| DMSO:Perfused vs. GW:Static       | -2.326  | -2.170 | -0.1560    | -0.7548 to 0.4428  | 0.9417           |
| DMSO:Perfused vs. GW:Perfused     | -2.326  | -2.686 | 0.3600     | -0.2388 to 0.9588  | 0.3691           |
| pSi:Static vs. pSi:Perfused       | -1.360  | -2.500 | 1.140      | 0.5412 to 1.739    | 0.0003           |
| pSi:Static vs. GW:Static          | -1.360  | -2.170 | 0.8100     | 0.2112 to 1.409    | 0.0060           |
| pSi:Static vs. GW:Perfused        | -1.360  | -2.686 | 1.326      | 0.7272 to 1.925    | <0.0001          |
| pSi:Perfused vs. GW:Static        | -2.500  | -2.170 | -0.3300    | -0.9288 to 0.2688  | 0.4549           |
| pSi:Perfused vs. GW:Perfused      | -2.500  | -2.686 | 0.1860     | -0.4128 to 0.7848  | 0.8873           |
| GW:Static vs. GW:Perfused         | -2.170  | -2.686 | 0.5160     | -0.08280 to 1.115  | 0.0990           |

**Table Supplementary 7:** Tukey-multiple comparison results between  $\Delta\Delta C_T$  for Coll VI.

| ANOVA table           | SS    | DF | MS     | F (DFn, DFd)      | P value  |
|-----------------------|-------|----|--------|-------------------|----------|
| Interaction           | 3.739 | 2  | 1.869  | F (2, 12) = 10.36 | P=0.0024 |
| Presence/Source of GW | 8.110 | 2  | 4.055  | F (2, 12) = 22.47 | P<0.0001 |
| Perfusion             | 7.805 | 1  | 7.805  | F (1, 12) = 43.24 | P<0.0001 |
| Residual              | 2.166 | 12 | 0.1805 |                   |          |

**Table Supplementary 8:** Two-way ANOVA table results for the Coll XII  $\Delta\Delta C_T$  values.

| Tukey's multiple comparisons test | Mean 1 | Mean 2 | Mean Diff. | 95.00% CI of diff. | Adjusted P Value |
|-----------------------------------|--------|--------|------------|--------------------|------------------|
| DMSO:Static vs. DMSO:Perfused     | -2.602 | -2.530 | -0.07200   | -1.237 to 1.093    | >0.9999          |
| DMSO:Static vs. pSi:Static        | -2.602 | -4.740 | 2.138      | 0.9729 to 3.303    | 0.0005           |
| DMSO:Static vs. pSi:Perfused      | -2.602 | -3.090 | 0.4880     | -0.6771 to 1.653   | 0.7230           |
| DMSO:Static vs. GW:Static         | -2.602 | -5.169 | 2.567      | 1.402 to 3.732     | <0.0001          |
| DMSO:Static vs. GW:Perfused       | -2.602 | -2.940 | 0.3380     | -0.8271 to 1.503   | 0.9176           |
| DMSO:Perfused vs. pSi:Static      | -2.530 | -4.740 | 2.210      | 1.045 to 3.375     | 0.0004           |
| DMSO:Perfused vs. pSi:Perfused    | -2.530 | -3.090 | 0.5600     | -0.6051 to 1.725   | 0.6052           |
| DMSO:Perfused vs. GW:Static       | -2.530 | -5.169 | 2.639      | 1.474 to 3.804     | <0.0001          |
| DMSO:Perfused vs. GW:Perfused     | -2.530 | -2.940 | 0.4100     | -0.7551 to 1.575   | 0.8371           |
| pSi:Static vs. pSi:Perfused       | -4.740 | -3.090 | -1.650     | -2.815 to -0.4849  | 0.0048           |
| pSi:Static vs. GW:Static          | -4.740 | -5.169 | 0.4290     | -0.7361 to 1.594   | 0.8114           |
| pSi:Static vs. GW:Perfused        | -4.740 | -2.940 | -1.800     | -2.965 to -0.6349  | 0.0024           |
| pSi:Perfused vs. GW:Static        | -3.090 | -5.169 | 2.079      | 0.9139 to 3.244    | 0.0007           |
| pSi:Perfused vs. GW:Perfused      | -3.090 | -2.940 | -0.1500    | -1.315 to 1.015    | 0.9976           |
| GW:Static vs. GW:Perfused         | -5.169 | -2.940 | -2.229     | -3.394 to -1.064   | 0.0004           |

**Table Supplementary 9:** Tukey-multiple comparison results between  $\Delta\Delta C_T$  for Coll XII.

| ANOVA table           | SS      | DF | MS      | F (DFn, DFd)       | P value  |
|-----------------------|---------|----|---------|--------------------|----------|
| Interaction           | 0.02014 | 2  | 0.01007 | F (2, 12) = 0.1161 | P=0.8914 |
| Presence/Source of GW | 5.275   | 2  | 2.638   | F (2, 12) = 30.41  | P<0.0001 |
| Perfusion             | 5.438   | 1  | 5.438   | F (1, 12) = 62.71  | P<0.0001 |
| Residual              | 1.041   | 12 | 0.08673 |                    |          |

**Table Supplementary 10:** Two-way ANOVA table results for the ALP  $\Delta\Delta C_T$  values.

| Tukey's multiple comparisons test | Mean 1 | Mean 2 | Mean Diff. | 95.00% CI of diff. | Adjusted P Value |
|-----------------------------------|--------|--------|------------|--------------------|------------------|
| DMSO:Static vs. DMSO:Perfused     | -2.278 | -3.454 | 1.176      | 0.3683 to 1.984    | 0.0039           |
| DMSO:Static vs. pSi:Static        | -2.278 | -3.294 | 1.016      | 0.2083 to 1.824    | 0.0116           |
| DMSO:Static vs. pSi:Perfused      | -2.278 | -4.307 | 2.029      | 1.221 to 2.837     | <0.0001          |
| DMSO:Static vs. GW:Static         | -2.278 | -1.964 | -0.3140    | -1.122 to 0.4937   | 0.7769           |
| DMSO:Static vs. GW:Perfused       | -2.278 | -3.073 | 0.7950     | -0.01267 to 1.603  | 0.0546           |
| DMSO:Perfused vs. pSi:Static      | -3.454 | -3.294 | -0.1600    | -0.9677 to 0.6477  | 0.9826           |
| DMSO:Perfused vs. pSi:Perfused    | -3.454 | -4.307 | 0.8530     | 0.04533 to 1.661   | 0.0364           |
| DMSO:Perfused vs. GW:Static       | -3.454 | -1.964 | -1.490     | -2.298 to -0.6823  | 0.0005           |
| DMSO:Perfused vs. GW:Perfused     | -3.454 | -3.073 | -0.3810    | -1.189 to 0.4267   | 0.6224           |
| pSi:Static vs. pSi:Perfused       | -3.294 | -4.307 | 1.013      | 0.2053 to 1.821    | 0.0118           |
| pSi:Static vs. GW:Static          | -3.294 | -1.964 | -1.330     | -2.138 to -0.5223  | 0.0014           |
| pSi:Static vs. GW:Perfused        | -3.294 | -3.073 | -0.2210    | -1.029 to 0.5867   | 0.9341           |
| pSi:Perfused vs. GW:Static        | -4.307 | -1.964 | -2.343     | -3.151 to -1.535   | <0.0001          |
| pSi:Perfused vs. GW:Perfused      | -4.307 | -3.073 | -1.234     | -2.042 to -0.4263  | 0.0026           |
| GW:Static vs. GW:Perfused         | -1.964 | -3.073 | 1.109      | 0.3013 to 1.917    | 0.0061           |

**Table Supplementary 11:** Tukey-multiple comparison results between  $\Delta\Delta C_T$  for ALP.



| <b>ANOVA table</b>    | <b>SS</b> | <b>DF</b> | <b>MS</b> | <b>F (DFn, DFd)</b> | <b>P value</b> |
|-----------------------|-----------|-----------|-----------|---------------------|----------------|
| Interaction           | 13.19     | 2         | 6.595     | F (2, 12) = 71.24   | P<0.0001       |
| Presence/Source of GW | 0.4836    | 2         | 0.2418    | F (2, 12) = 2.612   | P=0.1144       |
| Perfusion             | 0.03125   | 1         | 0.03125   | F (1, 12) = 0.3375  | P=0.5720       |
| Residual              | 1.111     | 12        | 0.09258   |                     |                |

**Table Supplementary 12:** Two-way ANOVA table results for the BMP2  $\Delta\Delta C_T$  values.

| <b>Tukey's multiple comparisons test</b> | <b>Mean 1</b> | <b>Mean 2</b> | <b>Mean Diff.</b> | <b>95.00% CI of diff.</b> | <b>Adjusted P Value</b> |
|------------------------------------------|---------------|---------------|-------------------|---------------------------|-------------------------|
| DMSO:Static vs. DMSO:Perfused            | -5.330        | -7.580        | 2.250             | 1.416 to 3.084            | <0.0001                 |
| DMSO:Static vs. pSi:Static               | -5.330        | -7.170        | 1.840             | 1.006 to 2.674            | <0.0001                 |
| DMSO:Static vs. pSi:Perfused             | -5.330        | -6.480        | 1.150             | 0.3155 to 1.984           | 0.0059                  |
| DMSO:Static vs. GW:Static                | -5.330        | -7.410        | 2.080             | 1.246 to 2.914            | <0.0001                 |
| DMSO:Static vs. GW:Perfused              | -5.330        | -5.600        | 0.2700            | -0.5645 to 1.104          | 0.8776                  |
| DMSO:Perfused vs. pSi:Static             | -7.580        | -7.170        | -0.4100           | -1.244 to 0.4245          | 0.5845                  |
| DMSO:Perfused vs. pSi:Perfused           | -7.580        | -6.480        | -1.100            | -1.934 to -0.2655         | 0.0083                  |
| DMSO:Perfused vs. GW:Static              | -7.580        | -7.410        | -0.1700           | -1.004 to 0.6645          | 0.9804                  |
| DMSO:Perfused vs. GW:Perfused            | -7.580        | -5.600        | -1.980            | -2.814 to -1.146          | <0.0001                 |
| pSi:Static vs. pSi:Perfused              | -7.170        | -6.480        | -0.6900           | -1.524 to 0.1445          | 0.1295                  |
| pSi:Static vs. GW:Static                 | -7.170        | -7.410        | 0.2400            | -0.5945 to 1.074          | 0.9202                  |
| pSi:Static vs. GW:Perfused               | -7.170        | -5.600        | -1.570            | -2.404 to -0.7355         | 0.0004                  |
| pSi:Perfused vs. GW:Static               | -6.480        | -7.410        | 0.9300            | 0.09551 to 1.764          | 0.0262                  |
| pSi:Perfused vs. GW:Perfused             | -6.480        | -5.600        | -0.8800           | -1.714 to -0.04551        | 0.0367                  |
| GW:Static vs. GW:Perfused                | -7.410        | -5.600        | -1.810            | -2.644 to -0.9755         | 0.0001                  |

**Table Supplementary 13:** Tukey-multiple comparison results between  $\Delta\Delta C_T$  for BMP2.

| <b>ANOVA table</b>    | <b>SS</b> | <b>DF</b> | <b>MS</b> | <b>F (DFn, DFd)</b> | <b>P value</b> |
|-----------------------|-----------|-----------|-----------|---------------------|----------------|
| Interaction           | 0.08392   | 2         | 0.04196   | F (2, 12) = 0.3769  | P=0.6938       |
| Presence/Source of GW | 3.637     | 2         | 1.818     | F (2, 12) = 16.33   | P=0.0004       |
| Perfusion             | 4.107     | 1         | 4.107     | F (1, 12) = 36.89   | P<0.0001       |
| Residual              | 1.336     | 12        | 0.1113    |                     |                |

**Table Supplementary 14:** Two-way ANOVA table results for the OPN  $\Delta\Delta C_T$  values.

| <b>Tukey's multiple comparisons test</b> | <b>Mean 1</b> | <b>Mean 2</b> | <b>Mean Diff.</b> | <b>95.00% CI of diff.</b> | <b>Adjusted P Value</b> |
|------------------------------------------|---------------|---------------|-------------------|---------------------------|-------------------------|
| DMSO:Static vs. DMSO:Perfused            | -2.003        | -2.801        | 0.7980            | -0.1170 to 1.713          | 0.1016                  |
| DMSO:Static vs. pSi:Static               | -2.003        | -2.682        | 0.6790            | -0.2360 to 1.594          | 0.2007                  |
| DMSO:Static vs. pSi:Perfused             | -2.003        | -3.619        | 1.616             | 0.7010 to 2.531           | 0.0008                  |
| DMSO:Static vs. GW:Static                | -2.003        | -2.910        | 0.9070            | -0.008046 to 1.822        | 0.0525                  |
| DMSO:Static vs. GW:Perfused              | -2.003        | -4.041        | 2.038             | 1.123 to 2.953            | <0.0001                 |
| DMSO:Perfused vs. pSi:Static             | -2.801        | -2.682        | -0.1190           | -1.034 to 0.7960          | 0.9975                  |
| DMSO:Perfused vs. pSi:Perfused           | -2.801        | -3.619        | 0.8180            | -0.09705 to 1.733         | 0.0902                  |
| DMSO:Perfused vs. GW:Static              | -2.801        | -2.910        | 0.1090            | -0.8060 to 1.024          | 0.9983                  |
| DMSO:Perfused vs. GW:Perfused            | -2.801        | -4.041        | 1.240             | 0.3250 to 2.155           | 0.0067                  |
| pSi:Static vs. pSi:Perfused              | -2.682        | -3.619        | 0.9370            | 0.02195 to 1.852          | 0.0437                  |
| pSi:Static vs. GW:Static                 | -2.682        | -2.910        | 0.2280            | -0.6870 to 1.143          | 0.9545                  |
| pSi:Static vs. GW:Perfused               | -2.682        | -4.041        | 1.359             | 0.4440 to 2.274           | 0.0033                  |
| pSi:Perfused vs. GW:Static               | -3.619        | -2.910        | -0.7090           | -1.624 to 0.2060          | 0.1700                  |
| pSi:Perfused vs. GW:Perfused             | -3.619        | -4.041        | 0.4220            | -0.4930 to 1.337          | 0.6427                  |
| GW:Static vs. GW:Perfused                | -2.910        | -4.041        | 1.131             | 0.2160 to 2.046           | 0.0131                  |

**Table Supplementary 15:** Tukey-multiple comparison results between  $\Delta\Delta C_T$  for OPN.

| ANOVA table           | SS     | DF | MS      | F (DFn, DFd)      | P value  |
|-----------------------|--------|----|---------|-------------------|----------|
| Interaction           | 7.223  | 2  | 3.612   | F (2, 12) = 49.19 | P<0.0001 |
| Presence/Source of GW | 12.42  | 2  | 6.210   | F (2, 12) = 84.58 | P<0.0001 |
| Perfusion             | 2.431  | 1  | 2.431   | F (1, 12) = 33.11 | P<0.0001 |
| Residual              | 0.8811 | 12 | 0.07342 |                   |          |

**Table Supplementary 16:** Two-way ANOVA table results for the OCN  $\Delta\Delta C_T$  values.

| Tukey's multiple comparisons test | Mean 1 | Mean 2 | Mean Diff. | 95.00% CI of diff. | Adjusted P Value |
|-----------------------------------|--------|--------|------------|--------------------|------------------|
| DMSO:Static vs. DMSO:Perfused     | -1.434 | -2.950 | 1.516      | 0.7729 to 2.259    | 0.0002           |
| DMSO:Static vs. pSi:Static        | -1.434 | -2.217 | 0.7830     | 0.03987 to 1.526   | 0.0369           |
| DMSO:Static vs. pSi:Perfused      | -1.434 | -3.958 | 2.524      | 1.781 to 3.267     | <0.0001          |
| DMSO:Static vs. GW:Static         | -1.434 | -4.748 | 3.314      | 2.571 to 4.057     | <0.0001          |
| DMSO:Static vs. GW:Perfused       | -1.434 | -3.696 | 2.262      | 1.519 to 3.005     | <0.0001          |
| DMSO:Perfused vs. pSi:Static      | -2.950 | -2.217 | -0.7330    | -1.476 to 0.01013  | 0.0540           |
| DMSO:Perfused vs. pSi:Perfused    | -2.950 | -3.958 | 1.008      | 0.2649 to 1.751    | 0.0067           |
| DMSO:Perfused vs. GW:Static       | -2.950 | -4.748 | 1.798      | 1.055 to 2.541     | <0.0001          |
| DMSO:Perfused vs. GW:Perfused     | -2.950 | -3.696 | 0.7460     | 0.002870 to 1.489  | 0.0489           |
| pSi:Static vs. pSi:Perfused       | -2.217 | -3.958 | 1.741      | 0.9979 to 2.484    | <0.0001          |
| pSi:Static vs. GW:Static          | -2.217 | -4.748 | 2.531      | 1.788 to 3.274     | <0.0001          |
| pSi:Static vs. GW:Perfused        | -2.217 | -3.696 | 1.479      | 0.7359 to 2.222    | 0.0003           |
| pSi:Perfused vs. GW:Static        | -3.958 | -4.748 | 0.7900     | 0.04687 to 1.533   | 0.0350           |
| pSi:Perfused vs. GW:Perfused      | -3.958 | -3.696 | -0.2620    | -1.005 to 0.4811   | 0.8361           |
| GW:Static vs. GW:Perfused         | -4.748 | -3.696 | -1.052     | -1.795 to -0.3089  | 0.0048           |

**Table Supplementary 17:** Tukey-multiple comparison results between  $\Delta\Delta C_T$  for OCN.

| Scaffold/Culture Condition | DF | Variance | $\chi^2$ | P Value |
|----------------------------|----|----------|----------|---------|
| DMSO/Static                | 5  | 2.41E-04 | 5.59439  | 0.3477  |
| pSi/Static                 |    | 1.52E-04 |          |         |
| GW/Static                  |    | 3.33E-04 |          |         |
| DMSO/Perfused              |    | 1.46E-04 |          |         |
| pSi/Perfused               |    | 5.72E-05 |          |         |
| GW/Perfused                |    | 5.38E-06 |          |         |

**Table Supplementary 18:** Bartlett's test for homogeneity of variances of bone mineral density (g/cm<sup>3</sup>).

| ANOVA table           | SS         | DF | MS         | F (DFn, DFd)       | P value  |
|-----------------------|------------|----|------------|--------------------|----------|
| Interaction           | 7.847e-005 | 2  | 3.924e-005 | F (2, 12) = 0.3776 | P=0.6934 |
| Presence/Source of GW | 0.01246    | 2  | 0.006232   | F (2, 12) = 59.98  | P<0.0001 |
| Perfusion             | 0.004984   | 1  | 0.004984   | F (1, 12) = 47.96  | P<0.0001 |
| Residual              | 0.001247   | 12 | 0.0001039  |                    |          |

**Table Supplementary 19:** Two-way ANOVA table results for the bone mineral density (BMD) (g/cm<sup>3</sup>) values.

| Tukey's multiple comparisons test | Mean 1  | Mean 2  | Mean Diff. | 95.00% CI of diff.     | Adjusted P Value |
|-----------------------------------|---------|---------|------------|------------------------|------------------|
| DMSO:Static vs. DMSO:Perfused     | 0.03501 | 0.07331 | -0.03831   | -0.06626 to -0.01035   | 0.0062           |
| DMSO:Static vs. pSi:Static        | 0.03501 | 0.07719 | -0.04219   | -0.07014 to -0.01423   | 0.0029           |
| DMSO:Static vs. pSi:Perfused      | 0.03501 | 0.1053  | -0.07027   | -0.09823 to -0.04232   | <0.0001          |
| DMSO:Static vs. GW:Static         | 0.03501 | 0.1016  | -0.06663   | -0.09459 to -0.03868   | <0.0001          |
| DMSO:Static vs. GW:Perfused       | 0.03501 | 0.1351  | -0.1001    | -0.1280 to -0.07212    | <0.0001          |
| DMSO:Perfused vs. pSi:Static      | 0.07331 | 0.07719 | -0.003880  | -0.03184 to 0.02408    | 0.9965           |
| DMSO:Perfused vs. pSi:Perfused    | 0.07331 | 0.1053  | -0.03196   | -0.05992 to -0.004008  | 0.0222           |
| DMSO:Perfused vs. GW:Static       | 0.07331 | 0.1016  | -0.02832   | -0.05628 to -0.0003680 | 0.0464           |
| DMSO:Perfused vs. GW:Perfused     | 0.07331 | 0.1351  | -0.06177   | -0.08972 to -0.03381   | <0.0001          |
| pSi:Static vs. pSi:Perfused       | 0.07719 | 0.1053  | -0.02808   | -0.05604 to -0.0001280 | 0.0487           |
| pSi:Static vs. GW:Static          | 0.07719 | 0.1016  | -0.02444   | -0.05240 to 0.003512   | 0.1003           |
| pSi:Static vs. GW:Perfused        | 0.07719 | 0.1351  | -0.05789   | -0.08584 to -0.02993   | 0.0002           |
| pSi:Perfused vs. GW:Static        | 0.1053  | 0.1016  | 0.003640   | -0.02432 to 0.03160    | 0.9974           |
| pSi:Perfused vs. GW:Perfused      | 0.1053  | 0.1351  | -0.02980   | -0.05776 to -0.001848  | 0.0344           |
| GW:Static vs. GW:Perfused         | 0.1016  | 0.1351  | -0.03344   | -0.06140 to -0.005488  | 0.0164           |

**Table Supplementary 20:** Tukey-multiple comparison results for BMD (g/cm<sup>3</sup>) values.

| Scaffold/Culture Condition | DF | Variance | $\chi^2$ | P Value |
|----------------------------|----|----------|----------|---------|
| DMSO/Static                | 5  | 7.70E+03 | 14.704   | 0.0117  |
| pSi/Static                 |    | 5.38E+04 |          |         |
| GW/Static                  |    | 2.16E+05 |          |         |
| DMSO/Perfused              |    | 1.63E+04 |          |         |
| pSi/Perfused               |    | 9.61E+05 |          |         |
| GW/Perfused                |    | 1.19E+04 |          |         |

**Table Supplementary 21:** Bartlett's test for homogeneity for variances of compressive modulus (KPa).

| <b>ANOVA table</b>    | <b>SS</b> | <b>DF</b> | <b>MS</b> | <b>F (DFn, DFd)</b> | <b>P value</b> |
|-----------------------|-----------|-----------|-----------|---------------------|----------------|
| Interaction           | 319707    | 2         | 159853    | F (2, 12) = 0.7578  | P=0.4899       |
| Presence/Source of GW | 2631396   | 2         | 1315698   | F (2, 12) = 6.237   | P=0.0139       |
| Perfusion             | 4896900   | 1         | 4896900   | F (1, 12) = 23.21   | P=0.0004       |
| Residual              | 2531261   | 12        | 210938    |                     |                |

**Table Supplementary 22:** Two-way ANOVA table results for the compressive modulus (KPa).

| <b>Tukey's multiple comparisons test</b> | <b>Mean 1</b> | <b>Mean 2</b> | <b>Mean Diff.</b> | <b>95.00% CI of diff.</b> | <b>Adjusted P Value</b> |
|------------------------------------------|---------------|---------------|-------------------|---------------------------|-------------------------|
| DMSO:Static vs. DMSO:Perfused            | 779.2         | 1667          | -887.7            | -2147 to 371.9            | 0.2412                  |
| DMSO:Static vs. pSi:Static               | 779.2         | 1387          | -607.9            | -1868 to 651.7            | 0.6013                  |
| DMSO:Static vs. pSi:Perfused             | 779.2         | 2805          | -2026             | -3286 to -766.6           | 0.0017                  |
| DMSO:Static vs. GW:Static                | 779.2         | 1541          | -761.8            | -2021 to 497.8            | 0.3802                  |
| DMSO:Static vs. GW:Perfused              | 779.2         | 2365          | -1585             | -2845 to -325.8           | 0.0116                  |
| DMSO:Perfused vs. pSi:Static             | 1667          | 1387          | 279.7             | -979.9 to 1539            | 0.9717                  |
| DMSO:Perfused vs. pSi:Perfused           | 1667          | 2805          | -1139             | -2398 to 121.0            | 0.0854                  |
| DMSO:Perfused vs. GW:Static              | 1667          | 1541          | 125.8             | -1134 to 1385             | 0.9993                  |
| DMSO:Perfused vs. GW:Perfused            | 1667          | 2365          | -697.7            | -1957 to 561.9            | 0.4672                  |
| pSi:Static vs. pSi:Perfused              | 1387          | 2805          | -1418             | -2678 to -158.7           | 0.0245                  |
| pSi:Static vs. GW:Static                 | 1387          | 1541          | -153.9            | -1414 to 1106             | 0.9981                  |
| pSi:Static vs. GW:Perfused               | 1387          | 2365          | -977.5            | -2237 to 282.1            | 0.1689                  |
| pSi:Perfused vs. GW:Static               | 2805          | 1541          | 1264              | 4.765 to 2524             | 0.0489                  |
| pSi:Perfused vs. GW:Perfused             | 2805          | 2365          | 440.8             | -818.8 to 1700            | 0.8401                  |
| GW:Static vs. GW:Perfused                | 1541          | 2365          | -823.6            | -2083 to 436.0            | 0.3064                  |

**Table Supplementary 23:** Tukey-multiple comparison results for compressive modulus (KPa).

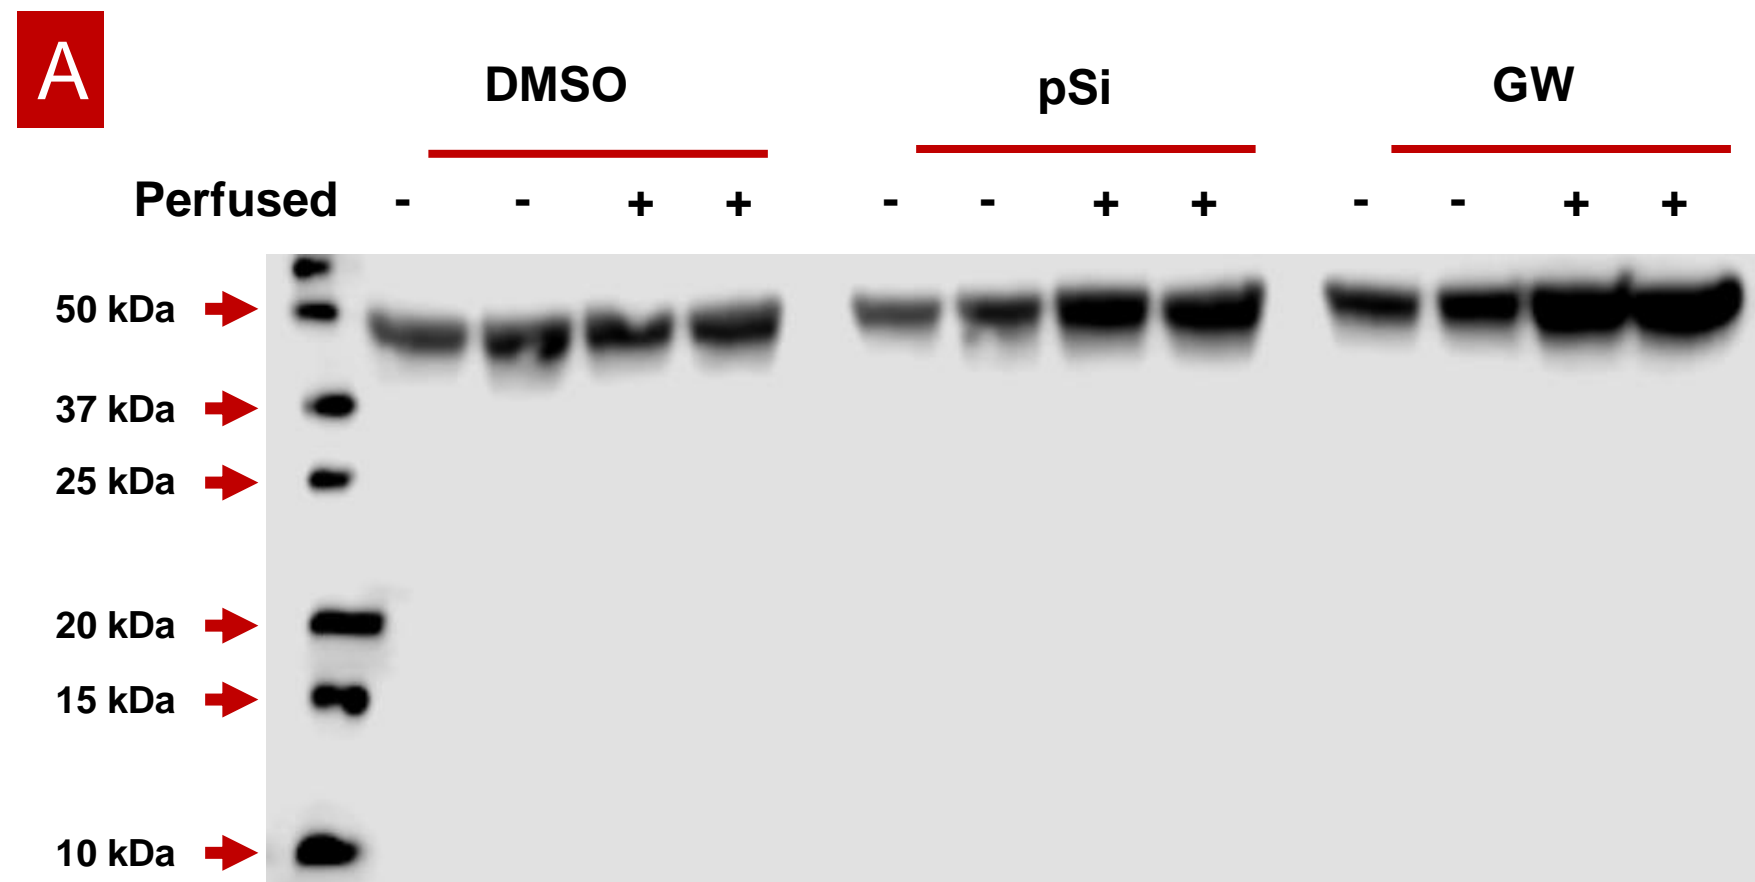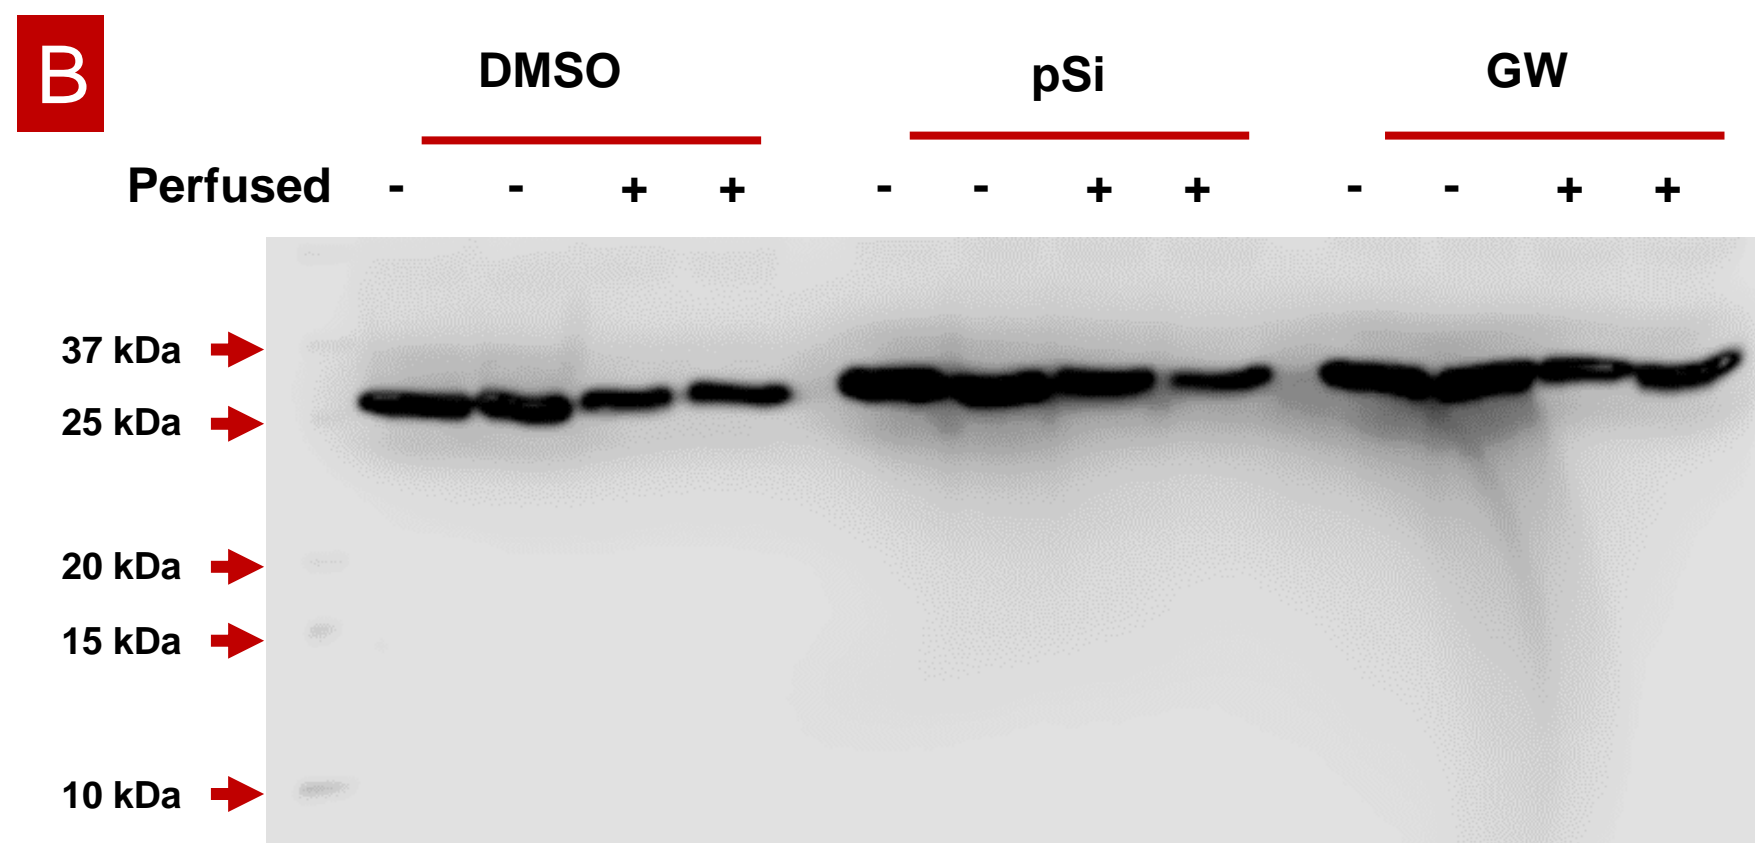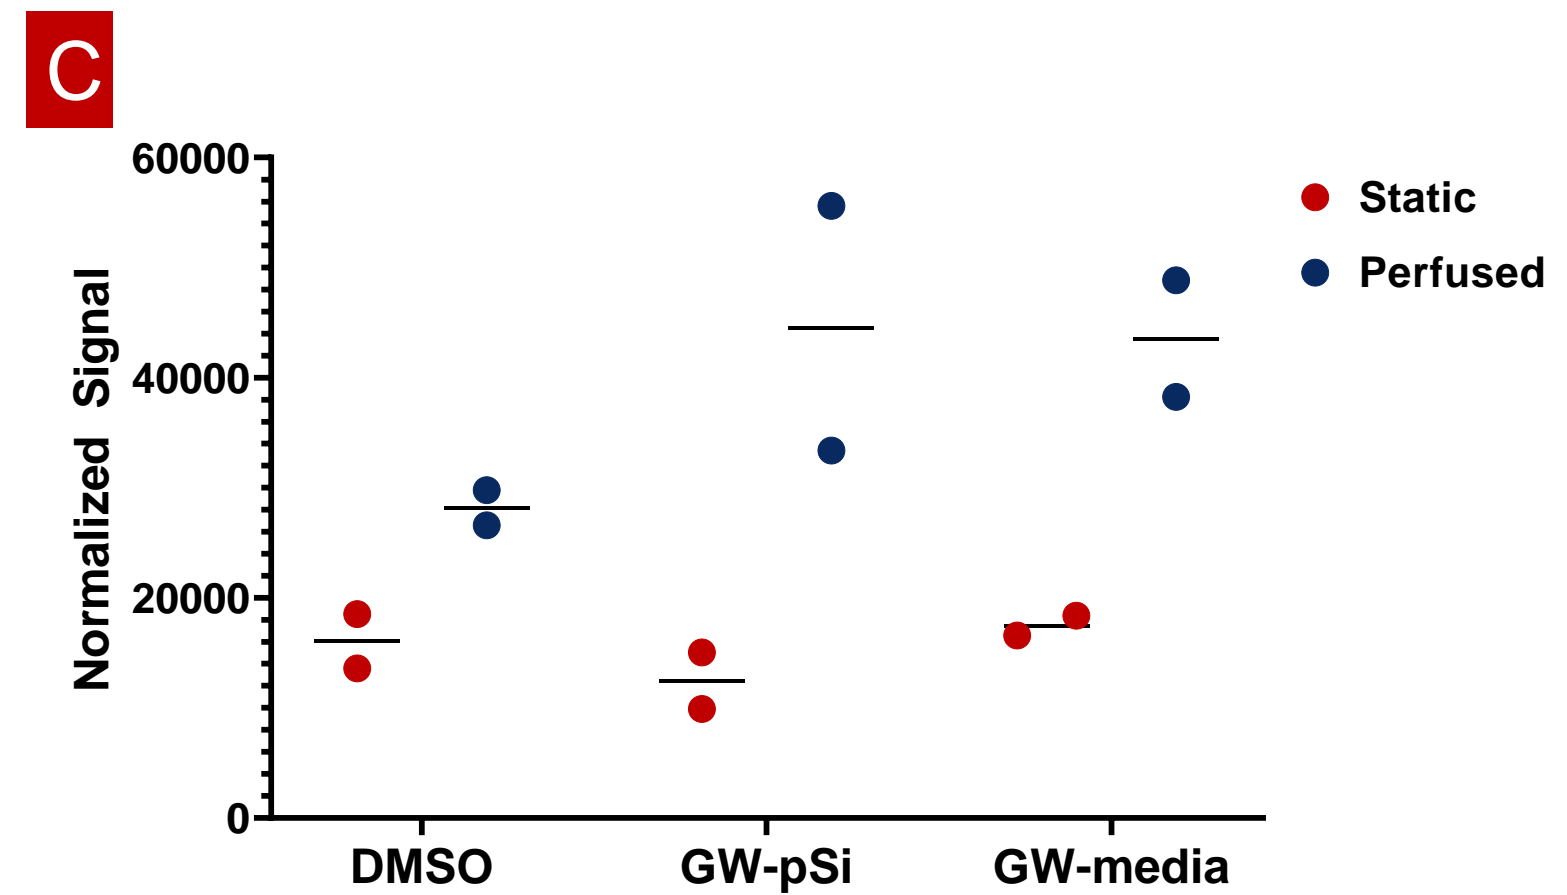

**Figure Supplementary 2:** Immunoblotting of extracted proteins from various hMSCs/scaffolds combinations after 8 days of culture for A) BMP2 and B) GAPDH. C) Densitometric measurement of BMP2 signal normalized to corresponding GAPDH signal.
